# Supplementary material for: A multiple T cell epitope comprising DNA vaccine boosts the protective efficacy of Bacillus Calmette–Guérin (BCG) against Mycobacterium tuberculosis
Source: Springer Nature journal article supplement (doi:10.1186/s12879-020-05372-1), 2020-09-17

## Supplementary Figure 1

### a Predicted cleavage sites of multiple protease families

M S Q I M Y N Y P A M L G A N T M A M M A R D T A E A A K W M L V L L V A V L V T A V Y A F V H A E I S T N I R Q A G V Q Y S R A D E  
E Q S E F A Y G S F V R T V S L P V G A D E L F A A F P S F A G L R P T F D T R L M

- Cleaved by Aspartic protease after this residue (P1 position)
- Cleaved by Cysteine protease after this residue (P1 position)
- Cleaved by Metalloprotease after this residue (P1 position)
- Cleaved by Serine protease after this residue (P1 position)
- Cleaved by different multiple protease superfamilies after this position (P1 position)

### b 5'-GGATCC

ATGGCTACCGGCTCTCGGACCTCACTCCTCCTCGCTTCGGACTGCTCTGTCTCCCTTGGCTCCAGGAAGTTCTGCTTCCCTACAATCCCCTGAGCGAGATTCCACTAAC  
ATCCGGCAGGCTGGAGTGCAGTACTCTCGCGCAGACGAGGAACAGGCCGTGTATGCTTTTGTGAGATTAGTACCAATATCCGACAGGCCGGGTGCAGTACTCAAGGGC  
TGATGAGGAACAGGCAGTGTATGCCTTCGTCCACATGCTGGTGTGCTCGTGGCCGTCCCTGTGACCGCCGTGTACGCATTTGTGCACGCCGTCTATGCTTTCGTCCACATG  
CTGGTGTGTTAGTCGCCGTGCTCGTCACAGCAGTGTACGCCTTTGTGCACGCTGTCTATGCATTCTGTGCATGCCAACACTATGGCCATGATGGCTAGAGACACCGCTGAGG  
CCGCTAAGTGGGTCTACGCTTTTGTGCACGCAAATACAATGGCAATGATGGCCGGGATACTGCAGAAGCAGCAAATGGGTGTATGCTTTTGTGCACATGAGCCAGATTA  
TGTACAACTATCCAGCCATGCTGGGTTATGCTTTCGTGCACATGTCCAGATCATGTACAATTATCCCGCAATGCTGGGCTACGCCTTTGTGCACTCTGAGTTTCGCTATGGA  
AGTTTTGTGCGCACAGTCTCACTGCCTGTGGGGGCTGACGAGGCAGTCTACGCCTTCGTGCACAGCGAATTTGCCTATGGTTCCTTCGTGAGAACCGTCTCTGCCAGTGG  
GCGCTGACGAAGCAGTCTACGCCTTCGTGCATCTTTCGCTGCATTTCCCTCCTTCGCCGGGCTGAGGCCTACCTTTGATACAAGACTCATGTACGCTTTCGTGCACCTGTT  
GCAGCCTTCCCTTCCCTCGCAGGACTCCGACCCACATTTGACACCAGACTGATG  
TGAAAGCTT-3'

# Supplementary Figure 2

**a**

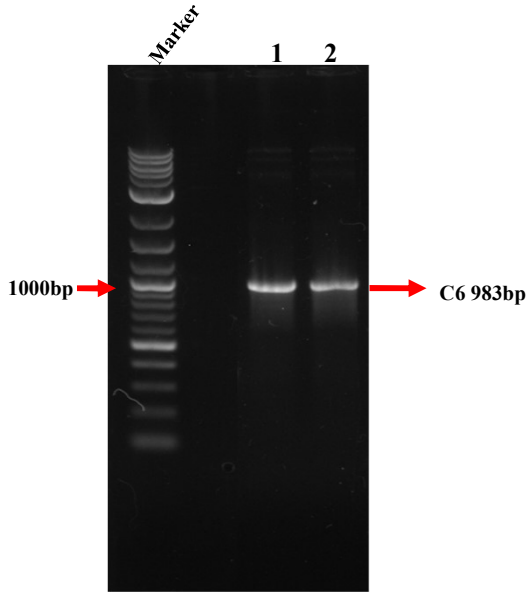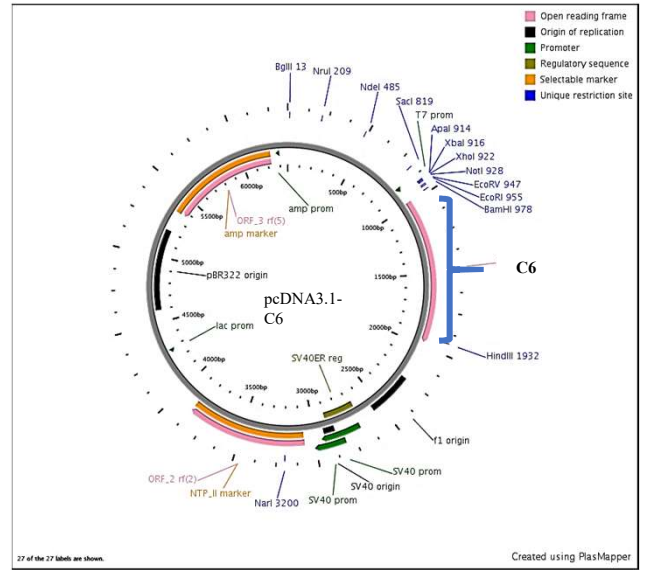

**b**

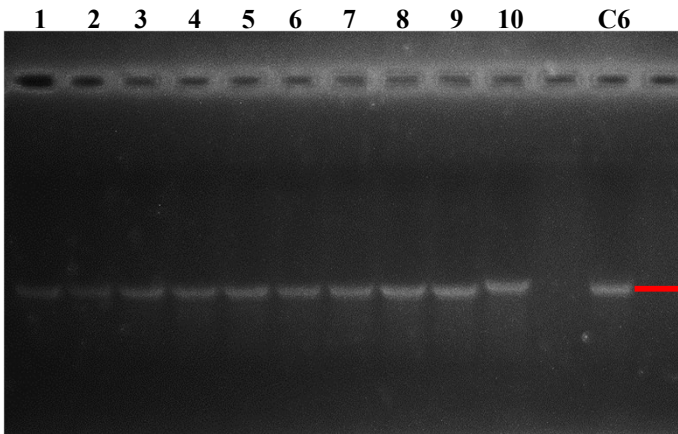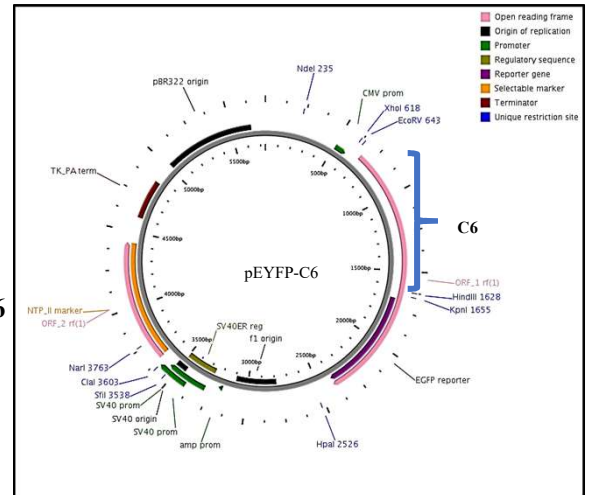

**c**

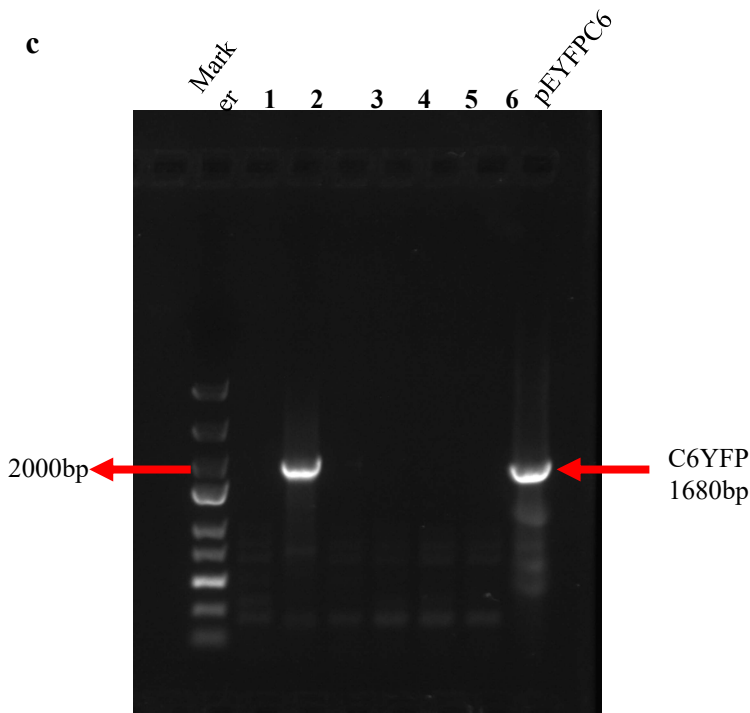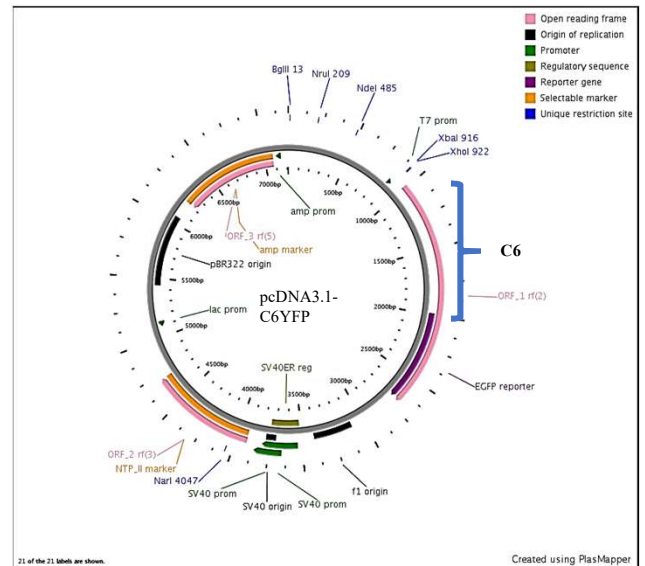

### Supplementary Figure 3

**a**

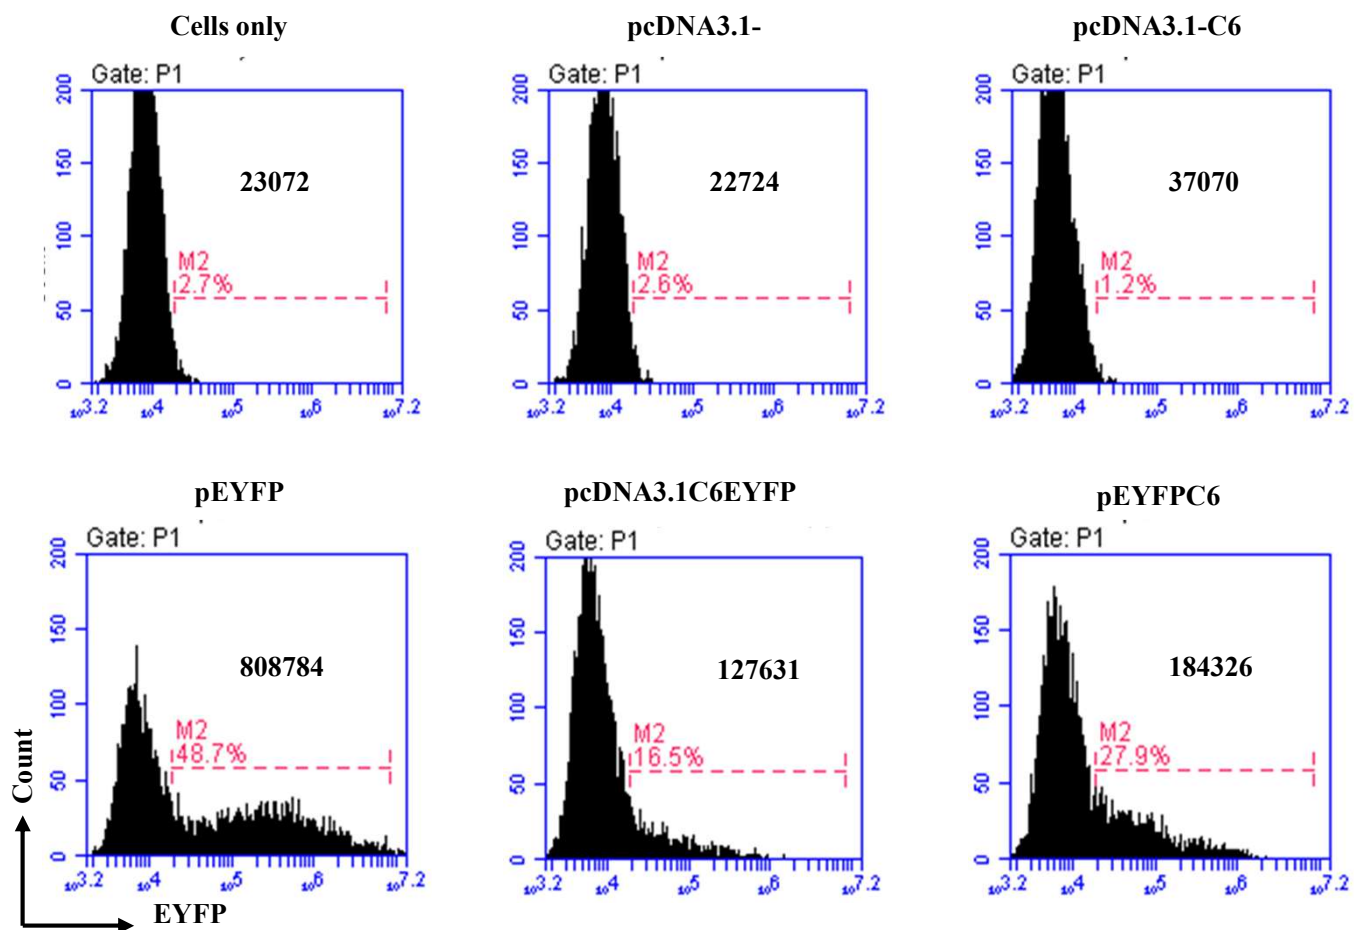

**b**

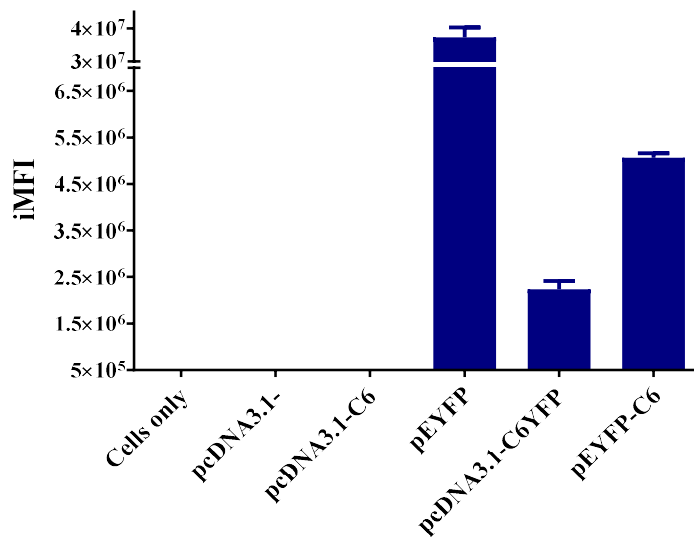

# Supplementary Figure 4

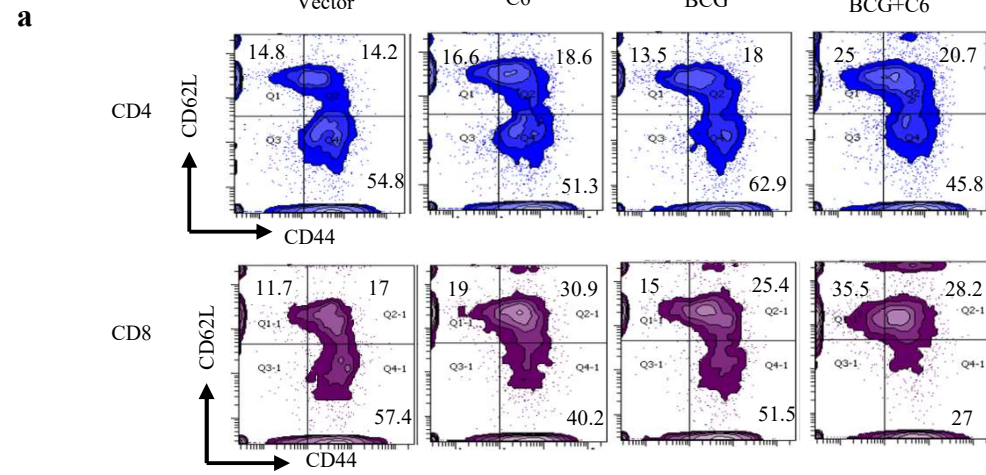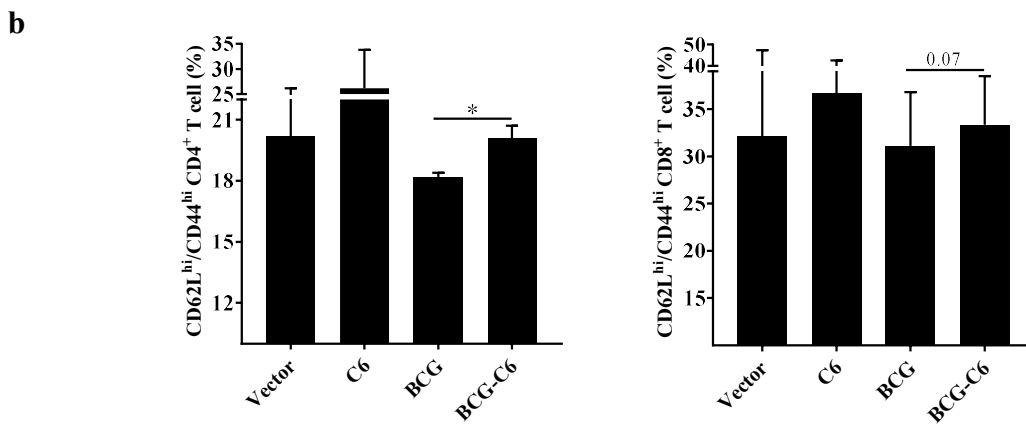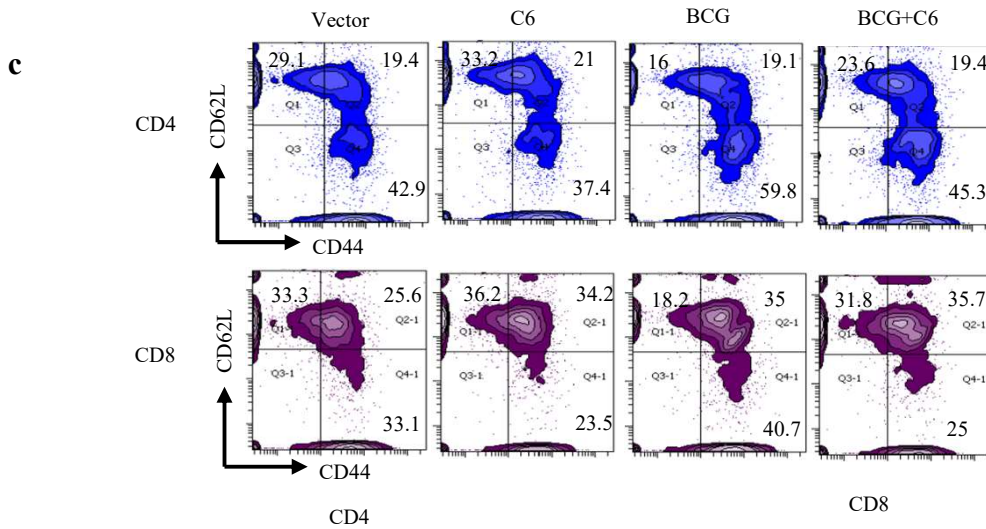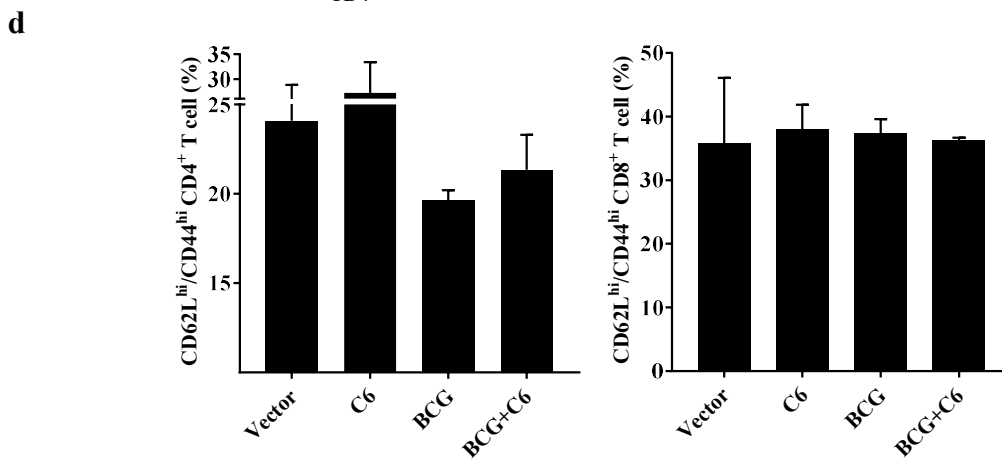

Supplementary Figure 5

**a**

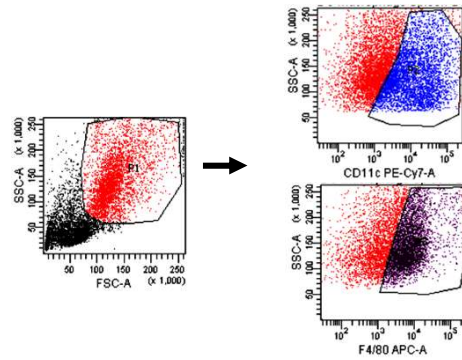

**b**

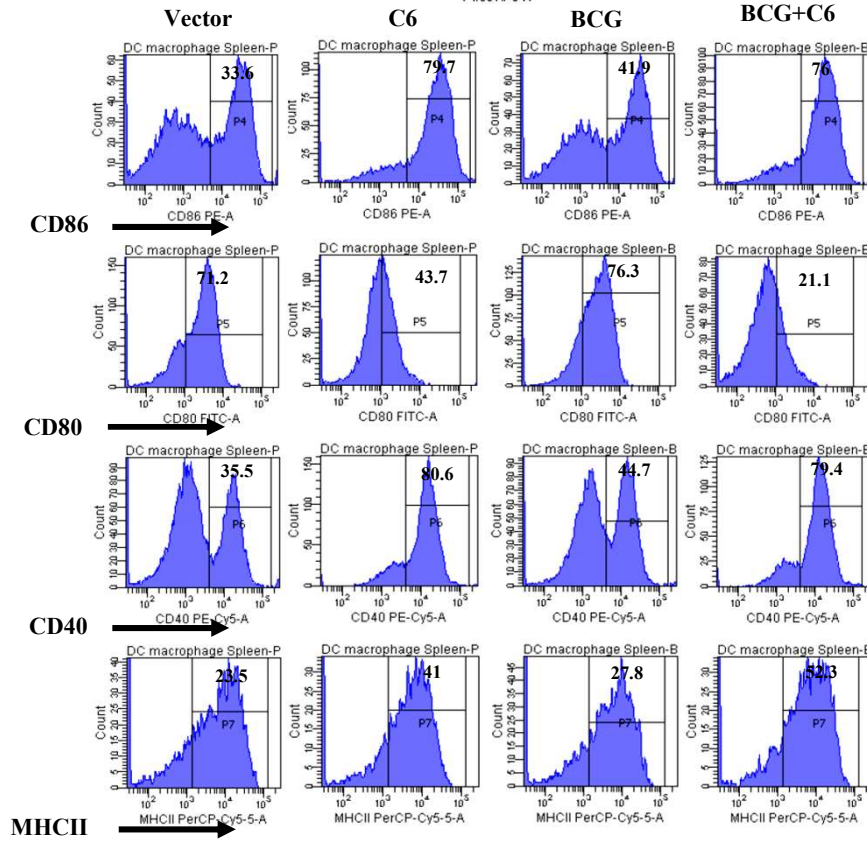

**c**

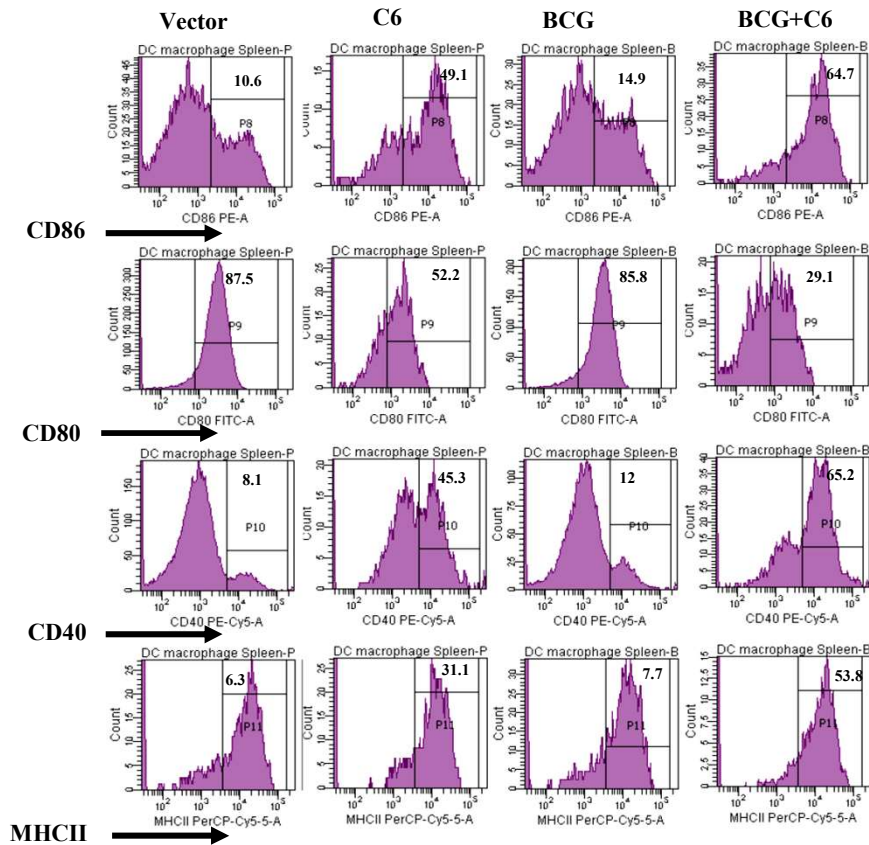

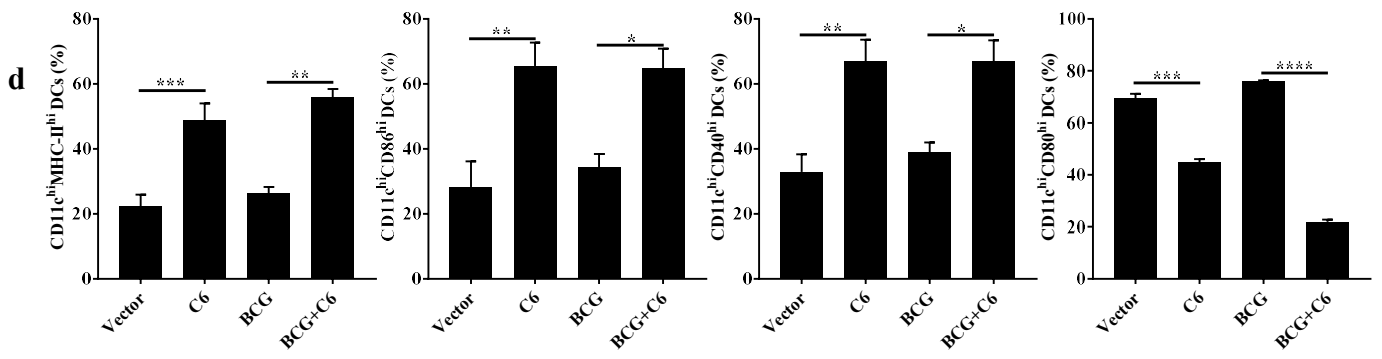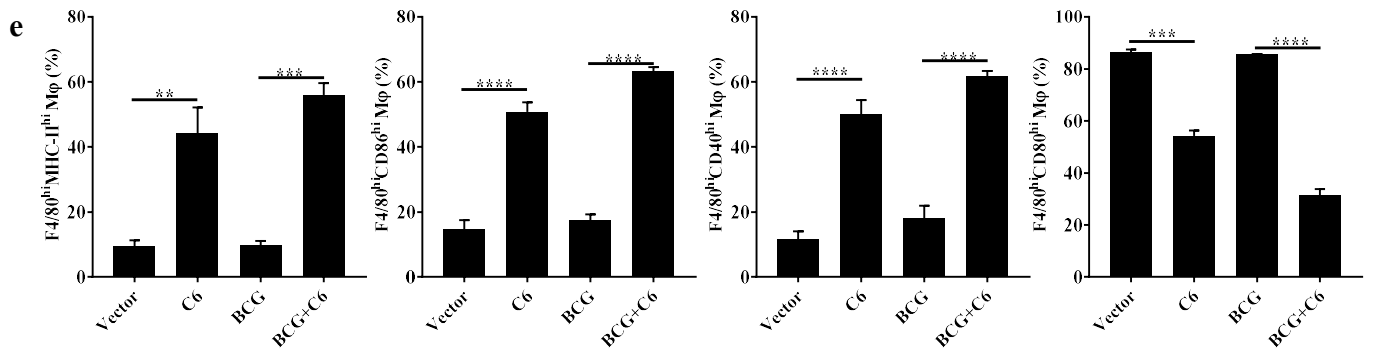

Supplement: MOESM1 [file 18390290]
